# Supplementary material for: Oral Magnesium Supplementation for Insomnia in Older Adults: A Systematic Review &amp; Meta-Analysis
Source: Research Square preprint supplement (doi:10.21203/rs.3.rs-192269/v1), 2021-02-25
Supplement: Supplementary file 2 [file 5b52d71c914d24eb866f20f2.docx]

**Additional File 5:**

**Example of Using the Grading of Recommendations, Assessment, Development and Evaluation (GRADE) Approach to Rate Quality/Certainty of the Evidence in this Systematic Review**

Outcome: Sleep Parameters, Total Sleep Time

Number of Studies: 2

| **GRADE Domain** | **Considerations** | **GRADE Assessment** |
| --- | --- | --- |
|  |  |  |
| Limitations in study design or execution | See figure 3. Both studies were at high risk of bias. In both studies, there was inadequate reporting such that no details of allocation randomisation or concealment available. In one study, no baseline characteristics were reported between groups. | Serious limitations, downgrade one level |
|  |  |  |
| Inconsistency of results | The variation in size of effect (mean difference) is small, the confidence intervals overlap, and statistical test for heterogeneity is not significant and I2 is small (noting the limitation that small sample sizes can yield low I2 values). | No inconsistency of results, no downgrade |
|  |  |  |
| Indirectness of evidence | The populations studied, intervention studied, comparators included and outcomes measured are all directly relevant to review question. | No serious indirectness, no downgrade |
|  |  |  |
| Imprecision | Total number of participants in each trial <50. Optimal information size not met (with assumptions α and β error thresholds of 0.05 and 0.2 and difference to detect is 30 minutes minimum). As per the GRADE handbook “whenever there are sample sizes that are less than 400, review authors and guideline developers should certainly consider rating down for imprecision.” | Serious limitations, downgrade one level |
|  |  |  |
| Publication bias | Reasons to suggest publication bias (small trials & search could have been more comprehensive). Reasons to not suspect publication bias (one study with positive effect and one with a null effect) | Borderline suspected, no downgrade |
|  |  |  |
| Quality of Evidence = LOW | | |

Reference: Schünemann H, Brozek J, Guyatt G, Oxman A, editors. 2009. GRADE handbook for grading quality of evidence and strength of recommendation. [updated October 2013]. The GRADE Working Group. Available from: https://gdt.gradepro.org/app/handbook/handbook.html#h.9rdbelsnu4iy
