# Supplementary material for: Oral Magnesium Supplementation for Insomnia in Older Adults: A Systematic Review &amp; Meta-Analysis
Source: Research Square preprint supplement (doi:10.21203/rs.3.rs-192269/v1), 2021-02-25
Supplement: Supplementary file 5 [file f5bb61ff086079ad10e17275.docx]

**Additional File 3:**

**Data Extraction Form**

General Information

| **Study ID** |  |
| --- | --- |
| **Study location** |  |
| **Ethical obtained for study** |  |
| **Study funding sources (Including role of funders)** |  |
| **Possible conflicts of interest (for study authors)** |  |

Methods

|  | **Descriptions as stated in report/paper** |
| --- | --- |
| **Aim of study** |  |
| **Design** |  |
| **Unit of allocation** |  |
| **Start date** |  |
| **End date** |  |
| **Randomization Method (incl. list generation)** |  |
| **Methods of Allocation Concealment** |  |
| **Blinding Method** |  |

Participants

|  | **Descriptions as stated in report/paper** |
| --- | --- |
| **Population description** |  |
| **Inclusion criteria** |  |
| **Exclusion criteria** |  |
| **Setting / Method of Recruitment** |  |
| **Total no. randomised** |  |
| **Age** |  |
| **Sex** |  |
| **Race/ethnicity** |  |
| **Other relevant socio-demographics** |  |
| **Co-morbidities** |  |
| **Diagnosis of Insomnia** |  |
| **Severity of illness** |  |
| **Subgroups measured** |  |
| **Subgroups reported** |  |

Intervention and Control

|  | **Description as stated in report/paper** |
| --- | --- |
| **Group (no. randomised)** | Intervention |
| **Description of intervention (timing, frequency, dosage, protocol, etc.…)** |  |
| **Duration of treatment period** |  |
| **Theoretical basis** |  |
| **Co-interventions** |  |
|  | |
| **Group (no. randomised)** | Control |
| **Description of control treatment** |  |
| **Washout period (for cross-over designs)** |  |

Follow Up

|  | **Description as stated in report/paper** |
| --- | --- |
| **Duration of follow up** |  |
| **Withdrawal rates** |  |
| **Reasons for withdrawal** |  |

Outcome / Domain 1: Sleep questionnaires

|  | **Description as stated in report/paper** |
| --- | --- |
| **Outcome description, definition and cut offs** |  |
| **Time points measured & reported** |  |
| **Measurement tools / instrument & validation** |  |
| **Imputation of missing data** |  |

Outcome / Domain 2: Sleep parameters

|  | **Description as stated in report/paper** |
| --- | --- |
| **Outcome description, definition and cut offs** |  |
| **Time points measured** |  |
| **Measurement tools / instrument & validation** |  |

Outcome / Domain 3: Safety data

|  | **Description as stated in report/paper** |
| --- | --- |
| **Outcome description, definition and cut offs** |  |
| **Time points measured** |  |
| **Measurement tools / instrument & validation** |  |

Outcome / Other: Biochemical findings

|  | **Description as stated in report/paper** |
| --- | --- |
| **Outcome description, definition and cut offs** |  |
| **Time points measured** |  |
| **Measurement tools / instrument & validation** |  |

Results

|  | | **Description as stated in report/paper** | | | | |
| --- | --- | --- | --- | --- | --- | --- |
| **Outcome** | |  | | | | |
| **Type of data** | |  | | | | |
| **Comparison** | |  | | | | |
| **Subgroup** | |  | | | | |
| **Time point** | |  | | | | |
| **Post-intervention or change from baseline?** | |  | | | | |
| **Results (post -intervention)** | **Intervention** | | | **Comparison** | | |
| **Mean** | **SD** | **No. participants** | **Mean** | **SD** | **No. participants** |
|  |  |  |  |  |  |
| **Any other results reported** | |  | | | | |
| **Statistical methods used and appropriateness of these *(e.g. adjustment for correlation)*** | |  | | | | |
| **Reanalysed results** | |  | | | | |

Results

|  | | **Description as stated in report/paper** | | | | |
| --- | --- | --- | --- | --- | --- | --- |
| **Outcome** | |  | | | | |
| **Type of data** | |  | | | | |
| **Comparison** | |  | | | | |
| **Subgroup** | |  | | | | |
| **Time point** | |  | | | | |
| **Post-intervention or change from baseline?** | |  | | | | |
| **Results (post -intervention)** | **Intervention** | | | **Comparison** | | |
| **Mean** | **SD** | **No. participants** | **Mean** | **SD** | **No. participants** |
|  |  |  |  |  |  |
| **Any other results reported** | |  | | | | |
| **Statistical methods used and appropriateness of these *(e.g. adjustment for correlation)*** | |  | | | | |
| **Reanalysed results** | |  | | | | |

Analysis Data

|  | **Description as stated in report/paper** |
| --- | --- |
| **Methods of Analysis (IIT vs PPA)** |  |
| **Comparability of groups at baseline** |  |
| **Statistical techniques** |  |

Conclusions

|  | **Description as stated in report/paper** |
| --- | --- |
| **Key conclusions of study authors** |  |

Other Information

| **Date Form Completed** |  |
| --- | --- |
| **Reference Citation** |  |

**Sources:**

Higgins JPT, Green S (editors). Cochrane Handbook for Systematic Reviews of Interventions Version 5.1.0 [updated March 2011]. The Cochrane Collaboration, 2011. Available from: [handbook.cochrane.org](http://handbook.cochrane.org).
